# Supplementary material
Source: publisher site journal article supplement (https://www.dovepress.com/article/498121)
Supplement: Supplementary file 1 [file get_supplementary_file.php]

**Table S1** Univariate Cox regression analysis in the development cohort

| Characteristics | HR | 95% CI | P |
| --- | --- | --- | --- |
| Age≥60 | 1.263 | 0.724-2.205 | 0.411 |
| Male | 0.992 | 0.552-1.782 | 0.979 |
| ECOG-PS≥2 | 4.697 | 1.444-15.275 | 0.010 |
| LDH≥250U/L | 1.835 | 0.956-3.523 | 0.068 |
| ꞵ2-MG≥2.5mg/L | 0.934 | 0.127-6.893 | 0.947 |
| D-Dimer≥2.41mg/L | 2.078 | 1.145-3.769 | 0.016 |
| ALB≥40g/L | 0.351 | 0.170-0.723 | 0.005 |
| Total bilirubin≥12μmol / L | 0.599 | 0.238-1.510 | 0.277 |
| Deep lesions | 1.136 | 0.646-1.997 | 0.659 |
| Multiple lesions | 1.211 | 0.687-2.134 | 0.508 |
| PNI≥45 | 0.443 | 0.249-0.787 | 0.006 |
| NLR≥1.8 | 3.401 | 1.218-9.496 | 0.019 |
| CSF protein≥0.6g/L | 0.906 | 0.471-1.742 | 0.767 |
| CSF tumor cells | 0.898 | 0.443-1.821 | 0.765 |

**Notes:**

**Abbreviations:** ECOG-PS, Eastern Cooperative Oncology Group performance status; LDH, lactate dehydrogenase; ꞵ2-MG, ꞵ2-microglobulin; ALB, albumin; Deep lesions, Tumor affecting in deep brain tissues included the basal ganglia, corpus callosum, brainstem, periventricular regions and cerebellum; PNI, prognostic nutritional index; NLR, neutrophil-to-lymphocyte ratio; CSF, cerebrospinal fluid.

**Table S2** Points for each constructed variables in the nomogram

| Variable | Point |
| --- | --- |
| ECOG-PS |  |
| <2 | 0 |
| ≥2 | 100 |
| D-Dimer  <2.41mg/L  ≥2.41mg/L | 0  56 |
| NLR |  |
| <1.8 | 0 |
| ≥1.8 | 77 |
| ALB |  |
| <40g/L | 52 |
| ≥40g/L | 0 |

**Notes:**

**Abbreviations:** ECOG-PS, Eastern Cooperative Oncology Group performance status; NLR, neutrophil-to-lymphocyte ratio; ALB, albumin;


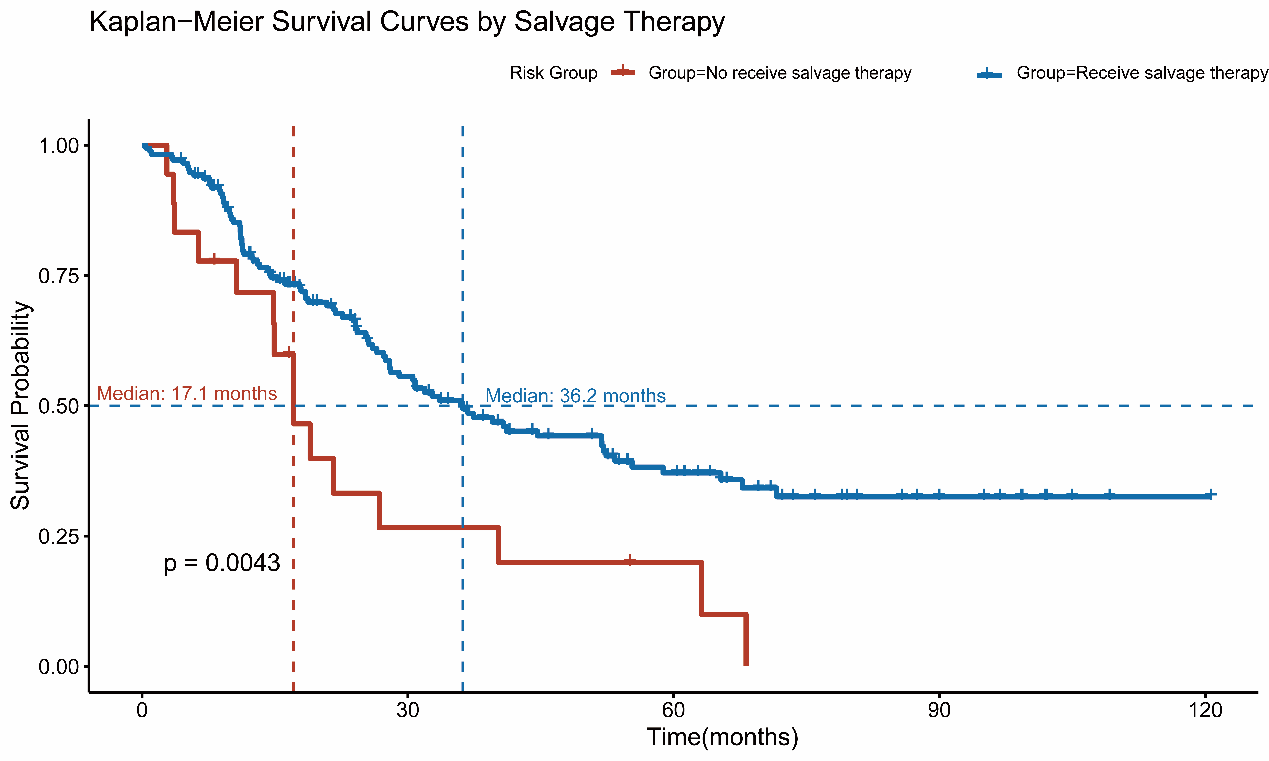


**Figure S1:** Kaplan-Meier survival curves for patients receiving and not receiving salvage therapy. The median OS for patients receiving salvage therapy was 36.2 months, while the median OS for those not receiving salvage therapy was 17.1 months. Statistical comparison using the log-rank test revealed a significant difference between the two groups (p = 0.0043).


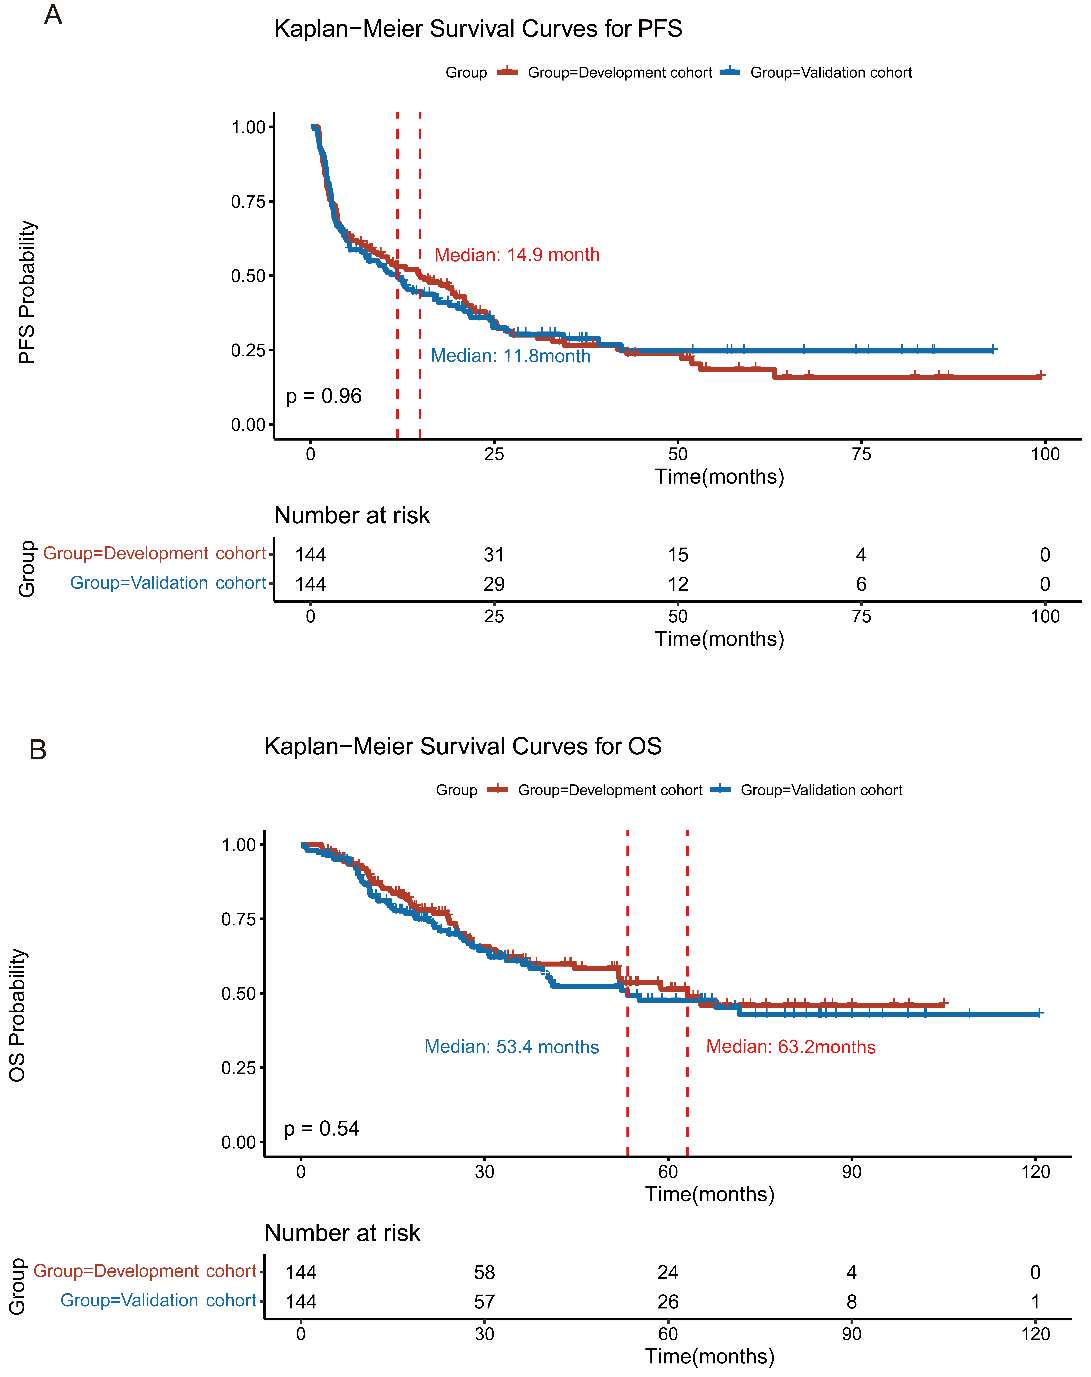


**Figure S2:** (A) Kaplan-Meier survival curves for PFS in the development cohort and validation cohort. The median PFS was 14.9 months in the development cohort and 11.8 months in the validation cohort (*p* = 0.96). (B) Kaplan-Meier survival curves for OS in the development cohort and validation cohort. The median OS was 63.2 months in the development cohort and 53.4 months in the validation cohort(*p* = 0.54)


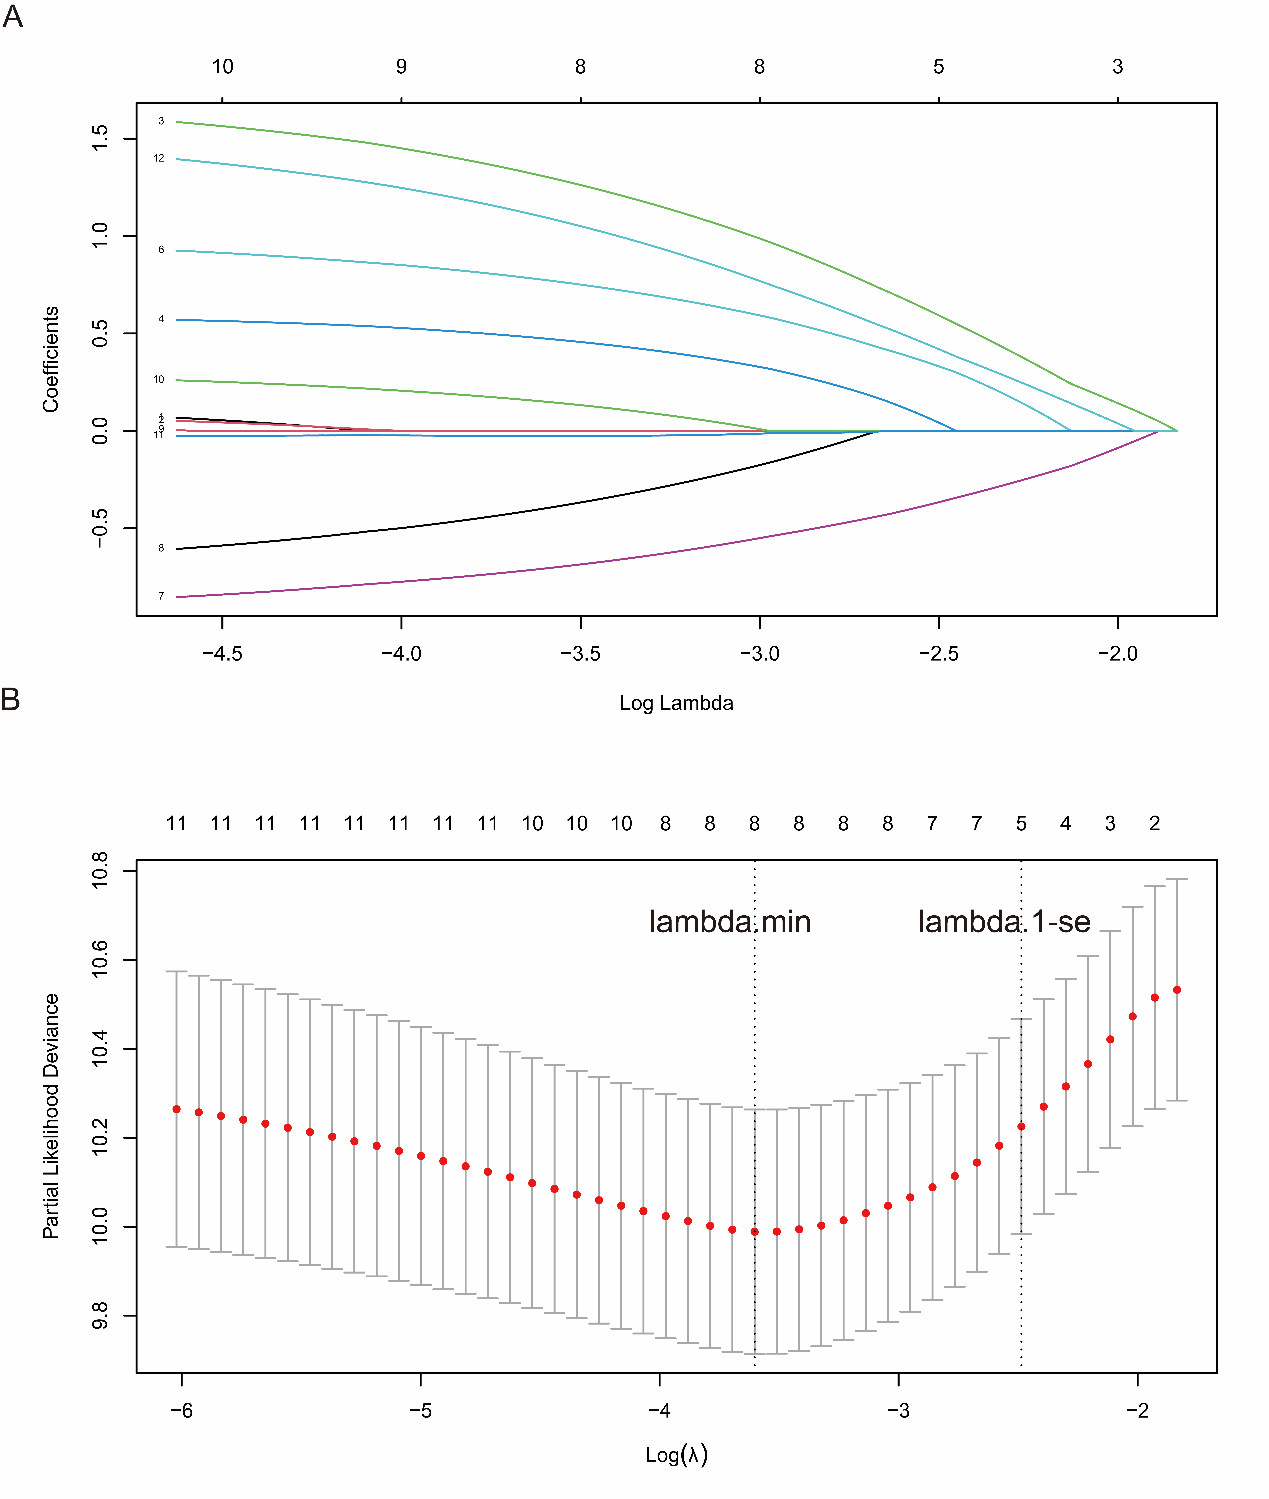


**Figure S3:** (A) Coefficient variation of the variables; (B) Selection of the optimal lambda.min value in the Lasso regression model through cross-validation.
